# Supplementary figures and images for: Potential efficacy of mitochondrial genes for animal DNA barcoding: a case study using eutherian mammals
Source: Springer Nature journal article supplement (doi:10.1186/1471-2164-12-84), 2011-01-28

1st and 2nd axes

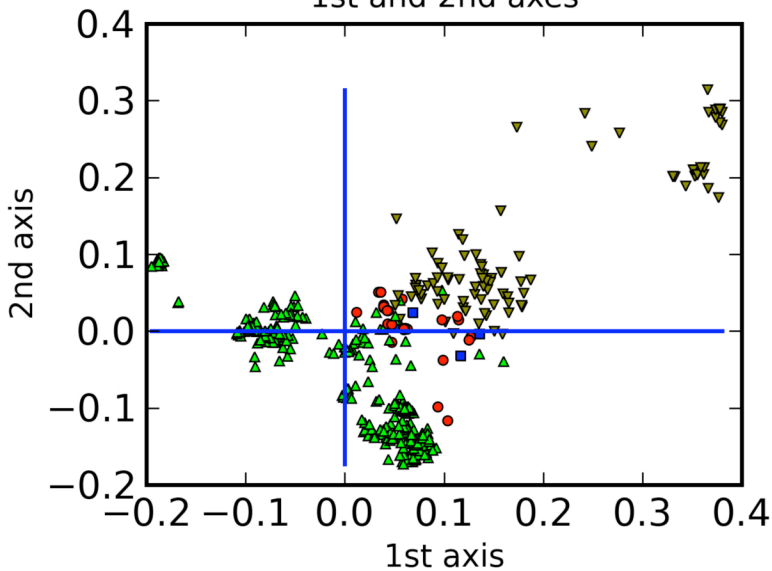

A

1st and 2nd axes

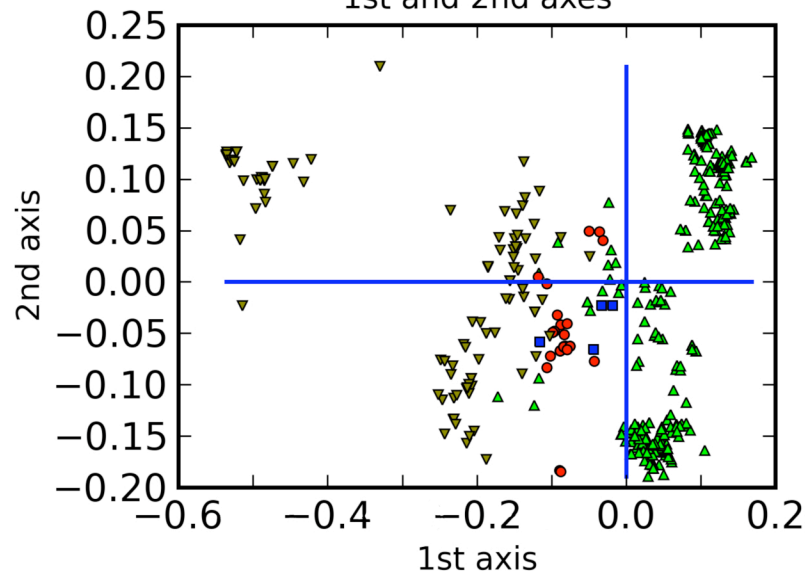

B

eigenvalue

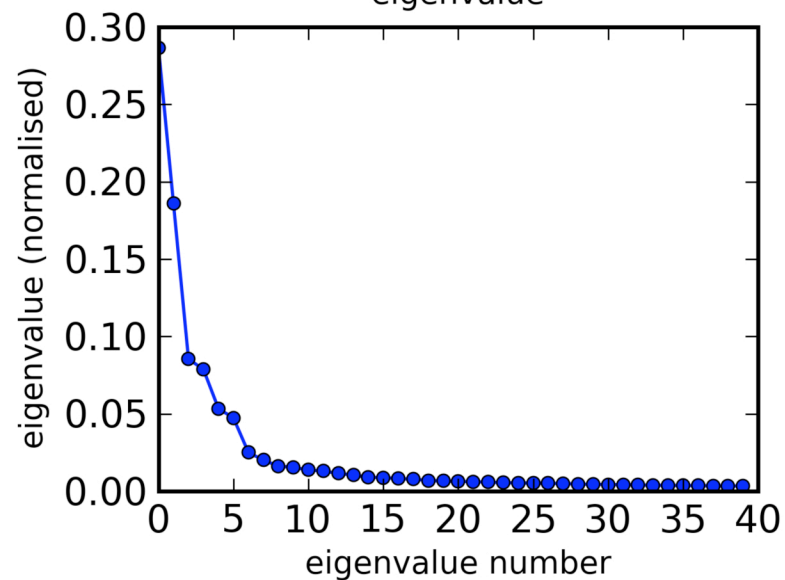

C

eigenvalue

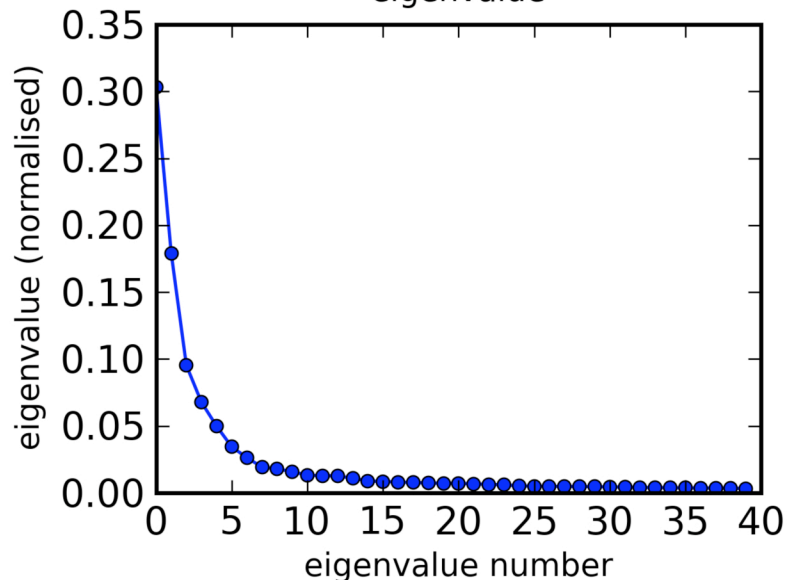

D

Supplement: 12864_2010_3215_MOESM10_ESM.pdf [file 12864_2010_3215_MOESM10_ESM.pdf]

Proportion of invariable sites

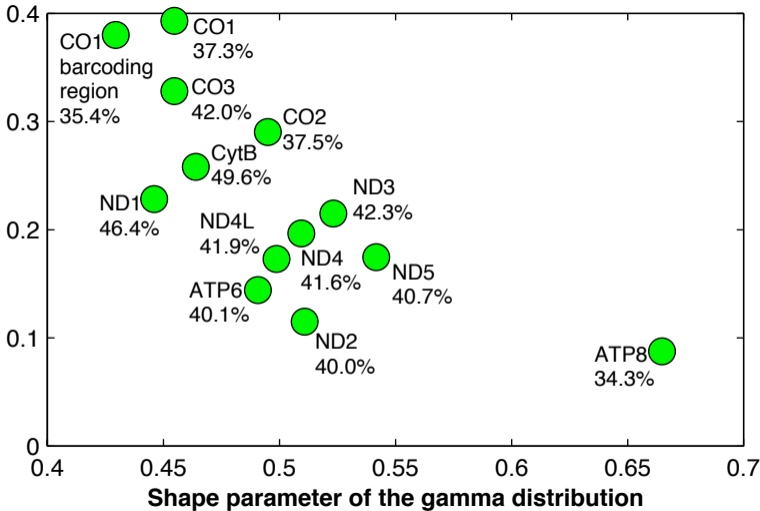

Supplement: 12864_2010_3215_MOESM11_ESM.pdf [file 12864_2010_3215_MOESM11_ESM.pdf]

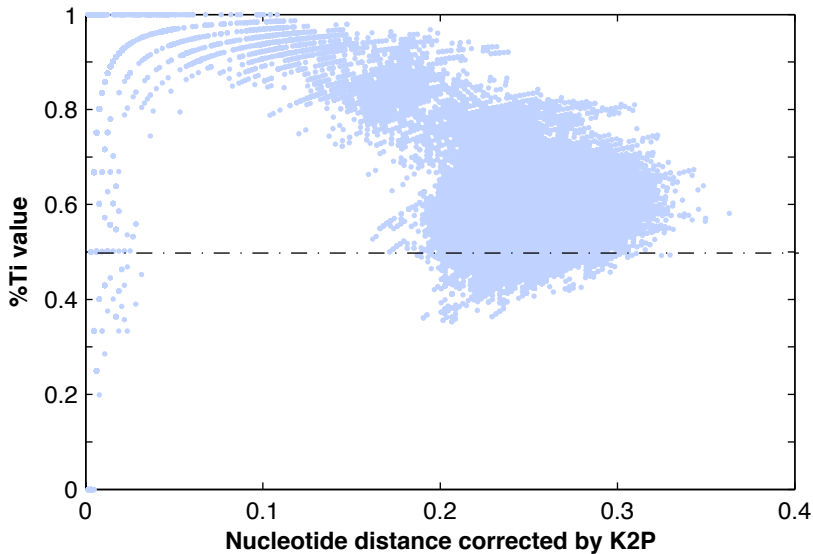

Supplement: 12864_2010_3215_MOESM12_ESM.pdf [file 12864_2010_3215_MOESM12_ESM.pdf]

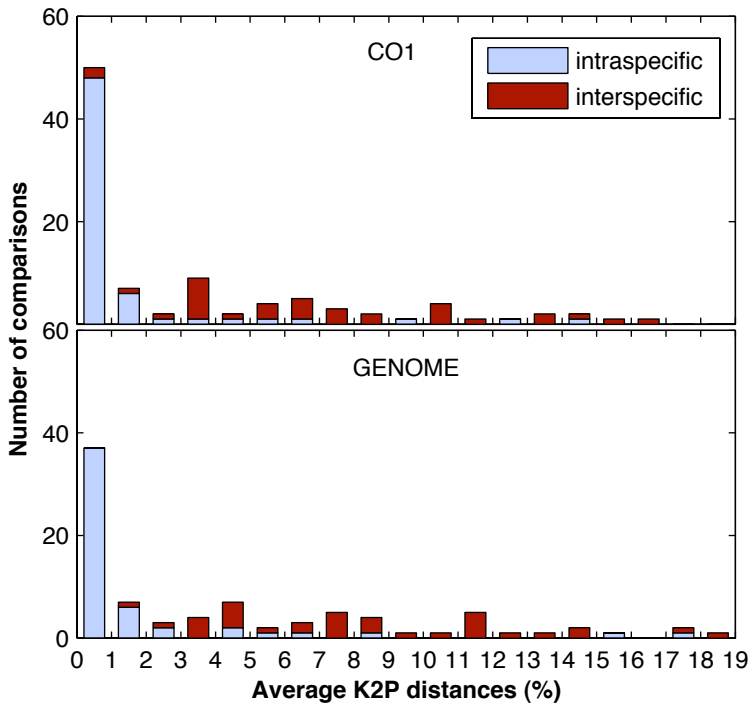

Supplement: 12864_2010_3215_MOESM7_ESM.pdf [file 12864_2010_3215_MOESM7_ESM.pdf]

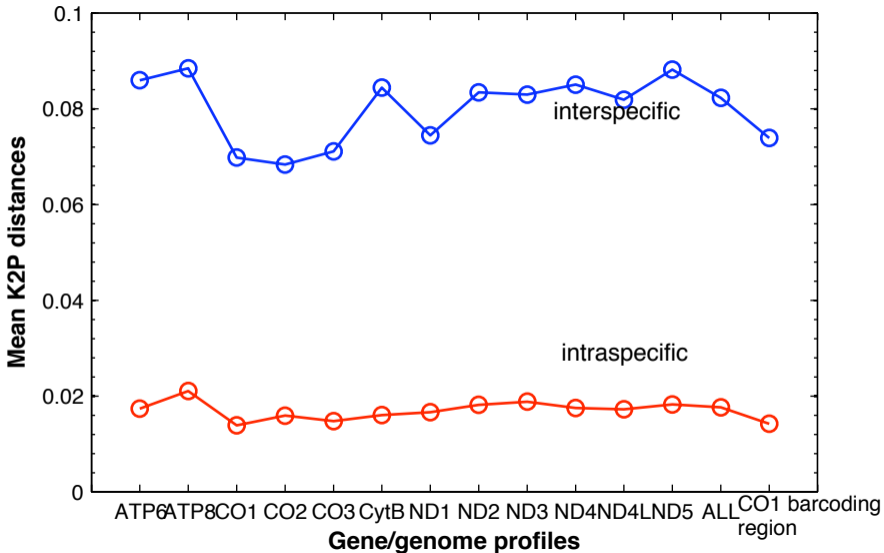

Supplement: 12864_2010_3215_MOESM8_ESM.pdf [file 12864_2010_3215_MOESM8_ESM.pdf]

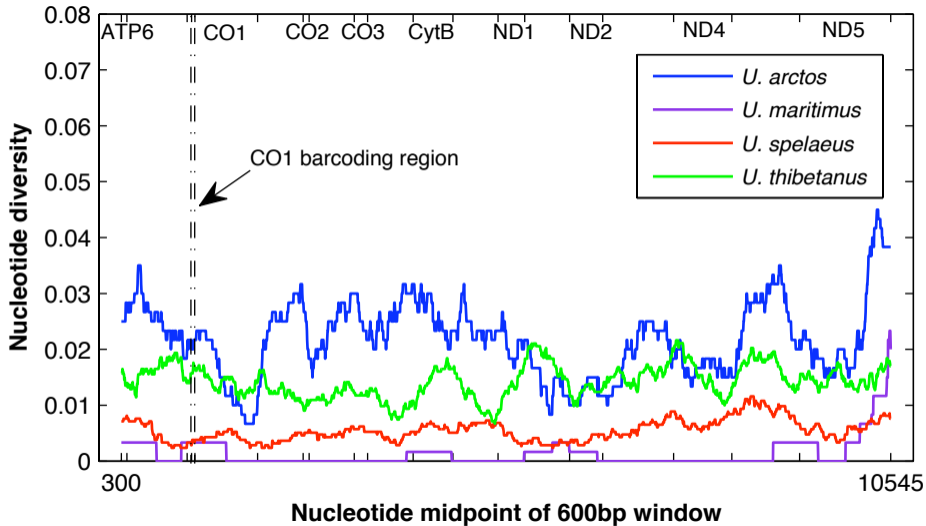

Supplement: 12864_2010_3215_MOESM9_ESM.pdf [file 12864_2010_3215_MOESM9_ESM.pdf]
